# Supplementary material
Source: PubMed Central journal article supplement (PMC7641206)
Supplement: 41422_2020_309_MOESM2_ESM.pdf [file 41422_2020_309_MOESM2_ESM.pdf]

# Supplementary Figure S2

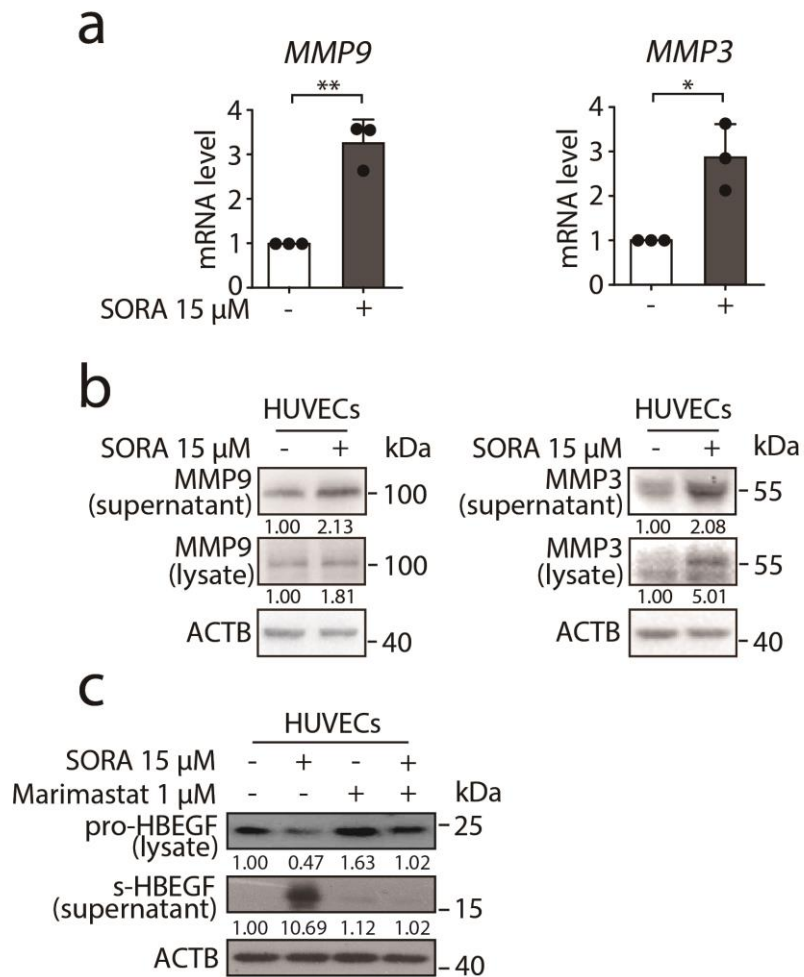

**Fig. S2 Sorafenib increases protein levels of MMP9 and MMP3 in a transcription-dependent manner.**

**a** HUVECs were treated with 15  $\mu$ M sorafenib for 24 h. *MMP9* and *MMP3* transcription levels were detected by RT-qPCR (N = 3). The result is presented as the mean  $\pm$  SD. Statistical analysis was performed using unpaired two-tailed Student's t-tests. \* $P < 0.05$ ; \*\* $P < 0.01$ . **b** HUVECs were exposed to 15  $\mu$ M sorafenib for 24 h. The levels of MMP9 and MMP3 in the supernatant or in total cell lysates were detected by western blot. **c** HUVECs were treated with or without sorafenib or marimastat for 24 h. The level of s-HBEGF in the supernatant or pro-HBEGF in total cell lysates was detected by western blot. Densitometric values are shown as optical density after ACTB normalization using Image J. SORA, sorafenib.
