# Supplementary material
Source: PubMed Central journal article supplement (PMC7641206)
Supplement: 41422_2020_309_MOESM3_ESM.pdf [file 41422_2020_309_MOESM3_ESM.pdf]

# Supplementary Figure S3

H&E

KRT1

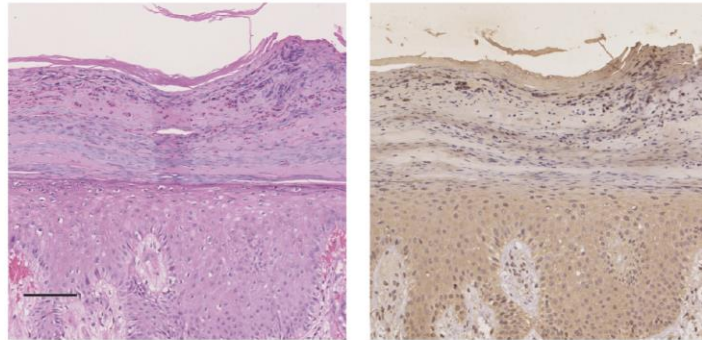

**Fig. S3 Histopathologic aspect with patient skin biopsy specimens.**

Skin sections from patient 6, a 60-year-old woman with metastatic thyroid carcinoma.

Representative H&E staining and KRT1 immunohistochemistry staining were performed.

Scale bar, 100  $\mu$ m.
