# Supplementary material
Source: PubMed Central journal article supplement (PMC7641206)
Supplement: 41422_2020_309_MOESM4_ESM.pdf [file 41422_2020_309_MOESM4_ESM.pdf]

## Supplementary Figure S4

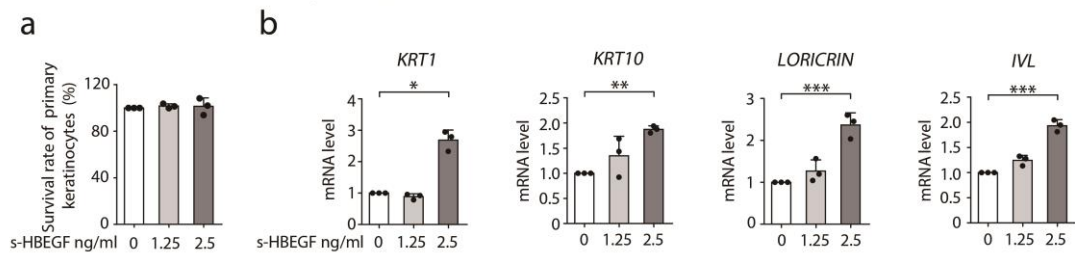

**Fig. S4 s-HBEGF induces keratinization in human primary keratinocytes.**

**a** Human primary keratinocytes were treated with s-HBEGF for 24 h. Cell survival rate was detected by SRB colorimetric assay (N = 3). **b** RT-qPCR analysis was used to measure the levels of *KRT1*, *KRT10*, *LORICRIN* and *IVL* in human primary keratinocytes treated with s-HBEGF recombinant protein for 24 h (N = 3). The results in **(a)** and **(b)** are presented as the mean  $\pm$  SD. Statistical analyses were performed using one-way ANOVA with Dunn's post hoc test when comparing the levels of *KRT1* and *KRT10* and with LSD post hoc test when comparing the levels of and *LORICRIN* and *IVL* in **(b)**. \* $P < 0.05$ ; \*\* $P < 0.01$ ; \*\*\* $P < 0.001$ .
