# Supplementary material
Source: PubMed Central journal article supplement (PMC7641206)
Supplement: 41422_2020_309_MOESM6_ESM.pdf [file 41422_2020_309_MOESM6_ESM.pdf]

Supplementary Figure S6

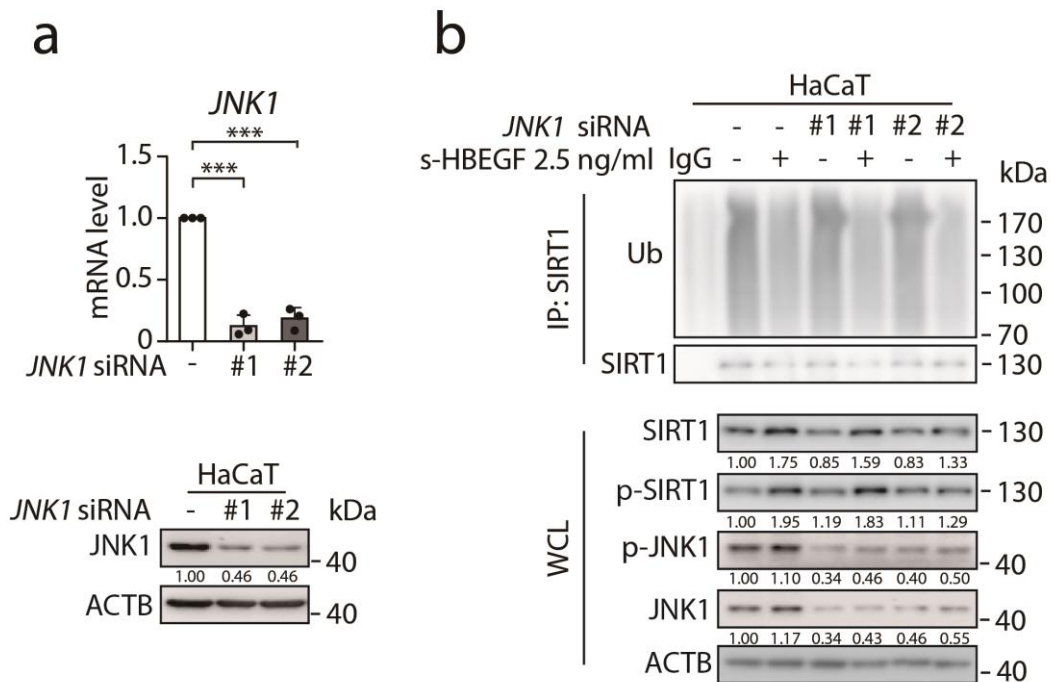

**Fig. S6 s-HBEGF stabilizes keratinocyte SIRT1 independent of JNK1.**

**a, b** HaCaT cells were transfected with non-targeting siRNA or siRNA targeting *JNK1*. **(a)** *JNK1* transcription level was detected by RT-qPCR (upper panel, N = 3) and the expression level of JNK1 was determined by western blot (lower panel). **(b)** Cell lysates were immunoprecipitated with anti-SIRT1 antibody and probed with anti-Ub antibody or with anti-SIRT1 antibody. Protein expression levels of endogenous p-SIRT1, SIRT1, p-JNK1, JNK1 are displayed. Statistical analyses were performed using one-way ANOVA with LSD post hoc test in **(a)**. \*\*\* $P < 0.001$ . Densitometric values are shown as optical density after ACTB normalization using Image J.
