# Supplementary material
Source: PubMed Central journal article supplement (PMC7641206)
Supplement: 41422_2020_309_MOESM7_ESM.pdf [file 41422_2020_309_MOESM7_ESM.pdf]

# Supplementary Figure S7

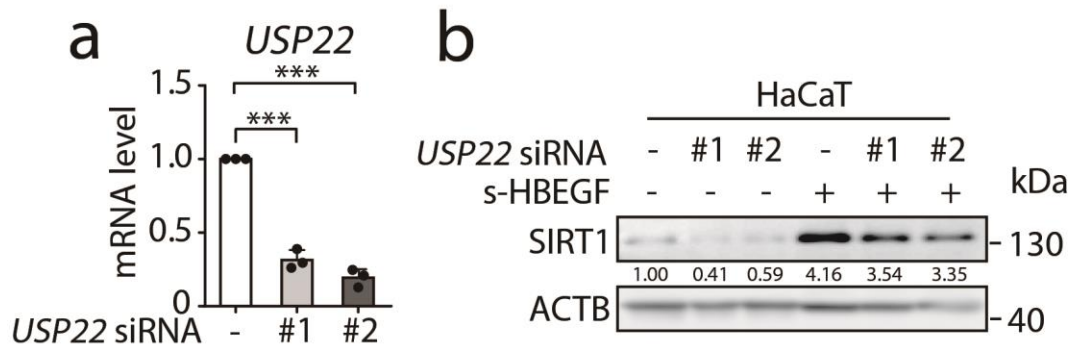

**Fig. S7 s-HBEGF stabilizes keratinocyte SIRT1 independent of USP22.**

**a** HaCaT cells were transfected with non-targeting siRNA or siRNA targeting *USP22*. *USP22* transcription level was detected by RT-qPCR (N = 3). The result is presented as the mean  $\pm$  SD. Statistical analysis was performed using one-way ANOVA with LSD post hoc test. \*\*\* $P$  < 0.001. **b** HaCaT cells were transfected with non-targeting siRNA or siRNA targeting *USP22*, followed by treatment with or without s-HB-EGF (2.5 ng/ml) for 24 h. The expression levels of SIRT1 were determined by western blot. Densitometric values are shown as optical density after ACTB normalization using Image J.
