# Supplementary material
Source: PubMed Central journal article supplement (PMC7641206)
Supplement: 41422_2020_309_MOESM8_ESM.pdf [file 41422_2020_309_MOESM8_ESM.pdf]

## Supplementary Figure S8

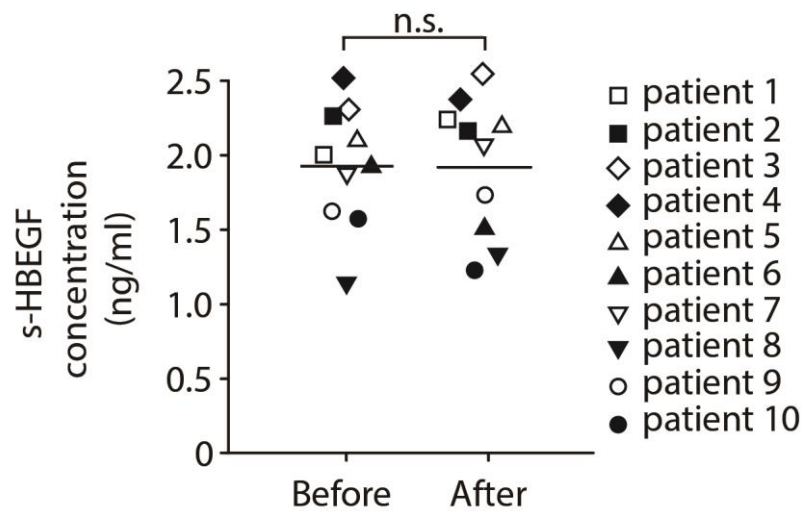

**Fig. S8 The level of s-HBEGF in patients with HFSR before and after NAM treatment.**

s-HBEGF concentrations of 10 patients were measured by ELISA before and after NAM treatment. ELISA, enzyme-linked immunosorbent assay; NAM, Nicotinamide. Statistical analyses were performed using unpaired two-tailed Student's t-test. n.s. = no significance.
