# Supplementary material
Source: PubMed Central journal article supplement (PMC7641206)
Supplement: 41422_2020_309_MOESM9_ESM.pdf [file 41422_2020_309_MOESM9_ESM.pdf]

## Supplementary Figure S9

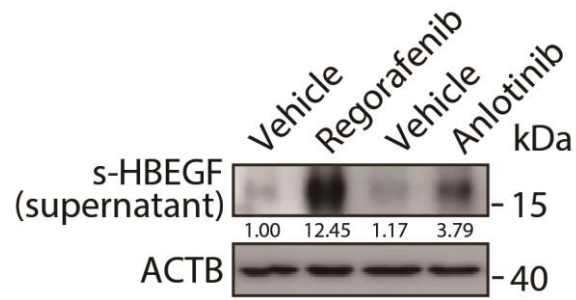

**Fig. S9 The effect of regorafenib and anlotinib on the release of s-HBEGF in HUVECs.**

HUVECs were exposed to 8  $\mu$ M regorafenib or 25 nM anlotinib for 24 h. The level of s-HBEGF in the supernatant was detected by western blot. Densitometric values are shown as optical density after ACTB normalization using Image J.
