# Supplementary material
Source: PubMed Central journal article supplement (PMC7641206)
Supplement: 41422_2020_309_MOESM10_ESM.pdf [file 41422_2020_309_MOESM10_ESM.pdf]

## Supplementary Figure S10

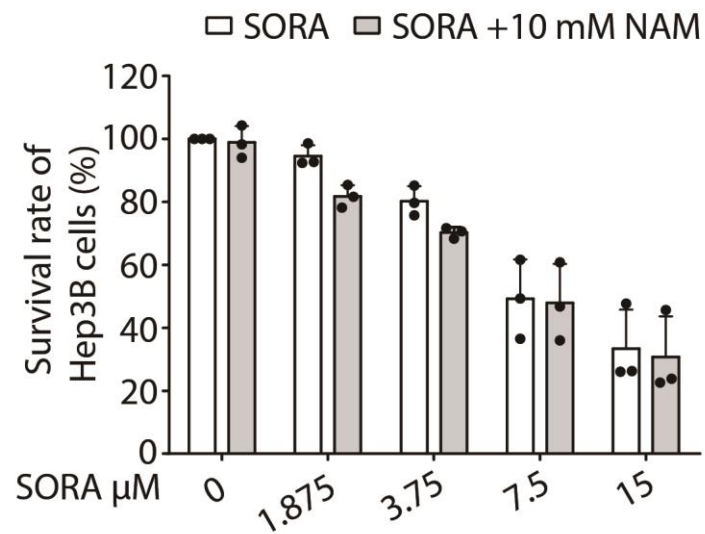

**Fig. S10 Nicotinamide does not affect sorafenib-induced Hep3B cell death.**

Hep3B cells were treated with 0-15  $\mu\text{M}$  sorafenib with or without nicotinamide 10  $\mu\text{M}$  for 72 h. Cell survival rate was detected by SRB colorimetric assay (N = 3). Data are expressed as the mean  $\pm$  SD. SORA, sorafenib; SRB, sulforhodamine B, NAM, nicotinamide.
